# Supplementary material for: On the Role of Large Nuclear Gravity in Understanding Strong Coupling Constant, Nuclear Stability Range, Binding Energy of Isotopes and Magic Proton Numbers &ndash; a Critical Review
Source: Preprints.org preprint supplement (doi:10.20944/preprints201810.0053.v1), 2018-10-03
Supplement: Supplementary file 1 [file supplementary]

# On the role of large nuclear gravity in understanding strong coupling constant, nuclear stability range, binding energy of isotopes and magic proton numbers – A critical review

<sup>1</sup>Honorary faculty, I-SERVE, Survey no-42, Hitech city, Hyderabad-84, Telangana, INDIA

<sup>2</sup>Dept. of Nuclear Physics, And

Seshavatharam.U.V.S<sup>1</sup> and S. Lakshminarayana<sup>2</sup>

hra University, Visakhapatnam-03, AP, INDIA

emails: seshavatharam.uvs@gmail.com and sln@auvsp.edu.in

**Abstract:** With reference to our earlier published views on large nuclear gravitational constant  $G_s$ , nuclear elementary charge  $e_s$  and strong coupling constant  $\alpha_s \equiv (e/e_s)^2$ , in this paper, we present simple relations for nuclear stability range, binding energy of isotopes and magic proton numbers.

**Summary:** Probable range of stable mass numbers can be estimated with  $A_s \equiv \left[ Z + \sqrt{(1/\alpha_s)} \pm 1 \right]^x$  where  $x \approx 1.2$  for  $Z \approx (3 \text{ to } 100)$  and  $x \approx 1.19$  for  $Z \geq 100$ .  $A_s$  can also be expressed as,  $A_s \approx 2Z + kZ^2$  where  $k \approx \left[ 4\pi\epsilon_0 (\hbar/2)^2 m_e c^2 / e^2 G_s m_p^3 \right] \approx 0.006333$ . Energy coefficient being  $\left[ e_s^2 / 8\pi\epsilon_0 (G_s m_p / c^2) \right] \approx 10.06$  MeV, for  $Z \approx (5 \text{ to } 118)$ , nuclear binding energy can be understood/fitted with two terms as,  $B_{A_s} \approx \left\{ A_s - \left[ (kA_s Z / 2.531) + 3.531 \right] \right\} \times 10.06$  MeV where  $\ln(1/\sqrt{k}) \approx (m_n - m_p / m_e) \approx 2.531$ . By considering a third term of the form  $\left[ (A_s - A)^2 / A_s \right]$ , binding energy of isotopes of  $Z$  can be fitted approximately. It needs further investigation.

## Discussion

- 1) So far no model could succeed in understanding nuclear binding energy with gravity.
- 2) So far no model could address or succeed in implementing strong coupling constant in low energy nuclear physics.
- 3) So far no model could attempt to understand nuclear stability and binding energy with the combined effects of strong nuclear gravity and strong nuclear charge.

- 4) Understanding nuclear binding energy with a single energy coefficient of magnitude  $\frac{e_s^2}{8\pi\epsilon_0 (G_s m_p / c^2)} \approx 10.09$  MeV is a challenging

task and so far, except Ghahramany et al, no one could attempt to do that. It may also be noted that, in Ghahramany's model, energy constant is a variable [32] and in our model energy constant remains same for any nuclide.

- 5) Estimation of nucleon stability range is simple in our model compared to SEMF and Ghahramany's model. Interesting point to be noted is that, in our model, nucleon stability range or stable mass numbers can be estimated without considering the binding energy formula. We have provided different relations for understanding nucleon stability.

- 6) Proposed new and result oriented number  $k \approx \left( \frac{4\pi\epsilon_0 \hbar^2 m_e c^2}{4e^2 G_s m_p^3} \right) \approx \frac{4\pi\epsilon_0 G_s m_p m_e}{4e_s^2} \approx 0.0063326$

seems to play a key role in understanding nuclear stability and binding energy vide relations (6), (7), (8), (9), (10), (16) and (20).

- 7) Proposed first term is not new and proposed second term  $\left[ (kA_s Z / 2.531) + 3.531 \right] \times 10.06$  MeV seems to play an excellent role in fitting and understanding the binding energy of medium and heavy stable nuclides. It can be evidenced from table-3. Correction seems to be required for light atomic nuclides. It needs further study.

- 8) Proposed third term  $\left[ (A_s - A)^2 / A_s \right] \times 10.06$  MeV seems to be approximate in fitting and understanding the binding energy of isotopes. We are working on it for its validity and better alternative with respect correct stable mass number of  $Z$ .

9) In deuteron, binding energy seems to be proportional to  $e^2$  and in other atomic nuclides, binding energy seems to be proportional to  $e_s^2$ .

10) Considering the average of  $(e^2, e_s^2)$  and without considering 0.71 MeV (as there exists only one proton), based on relation (22), binding energies of  $1H2$  and  $1H3$  nuclides can be estimated as,  
 $\left[2-2^{\frac{1}{3}}\right]5.6 \cong 4.15$  MeV and  
 $\left[3-3^{\frac{1}{3}}\right]5.6 \cong 8.72$  MeV respectively.

11) Considering the average of  $(e^2, e_s^2)$  and considering 0.71 MeV (since there exists two protons), based on relation (22), binding energy of  $2He3$  can be estimated as,  $\left[3-3^{\frac{1}{3}}\right]4.9 \cong 7.63$  MeV.

12) Coulombic energy coefficient being 0.7 MeV, with reference to  $\ln\left(\frac{e^2}{4\pi\epsilon_0 G_s m_p m_e}\right) \cong 1.515$ , volume or surface energy coefficient can be expressed as  $1.515*10.09 = 15.3$  MeV and asymmetric energy coefficient can be expressed as,  $1.515*15.3 = 23.0$  MeV. For  $(Z \geq 10)$ , binding energy can also be estimated with,

$$B_A \cong (A - A^{2/3} - 1) * 15.3 \text{ MeV} - \frac{Z^2}{A^{1/3}} * 0.7 \text{ MeV} - \frac{(A - 2Z)^2}{A} * 23.0 \text{ MeV} \quad (26)$$

13) With advanced research in high energy nuclear physics, hadronic melting points can be understood and bare quarks can be made identifiable.

14) With further research in nuclear astrophysics, it is certainly possible to understand the combined effects of Newtonian gravitational constant and proposed nuclear gravitational constant. Considering the ratio of nuclear gravitational constant and Newtonian gravitational constant, estimated masses of white dwarfs, neutron stars and black holes [33,34], can be fitted approximately. For example,

$$\left. \begin{aligned} M_x &\cong \left(\frac{G_s}{G_N}\right) \sqrt{\frac{e^2}{4\pi\epsilon_0 G_N}} \approx 0.473 M_\odot \\ M_x &\cong \left(\frac{G_s}{G_N}\right) \sqrt{\frac{e_s^2}{4\pi\epsilon_0 G_N}} \approx 1.373 M_\odot \\ M_x &\cong \left(\frac{G_s}{G_N}\right) \sqrt{\frac{\hbar c}{G_N}} \approx 5.456 M_\odot \end{aligned} \right\} \quad (27)$$

$$\left. \begin{aligned} M_x &\cong \sqrt{\frac{G_s}{G_N}} \frac{e^2}{4\pi\epsilon_0 G_N m_p} \approx 0.023 M_\odot \\ M_x &\cong \sqrt{\frac{G_s}{G_N}} \frac{e_s^2}{4\pi\epsilon_0 G_N m_p} \approx 0.2 M_\odot \\ M_x &\cong \sqrt{\frac{G_s}{G_N}} \left(\frac{\hbar c}{G_N m_n}\right) \approx 3.174 M_\odot \end{aligned} \right\} \quad (28)$$

15) At the moment of a neutron star's birth, the nucleons that compose it have a temperature of around  $10^{11}$  to  $10^{12}$  K [35]. Considering  $M_x$  as a critical mass for neutron stars and black holes, corresponding critical temperature can be fitted with,

$$\left. \begin{aligned} T_x &\cong \frac{\hbar c^3}{8\pi k_B G_N \sqrt{M_x M_{pl}}} \\ \text{where, } M_{pl} &\cong \sqrt{\frac{\hbar c}{G_N}} \cong 2.176 \times 10^{-8} \text{ kg} \end{aligned} \right\} \quad (29)$$

16) Quantitatively, Fermi's weak coupling constant [36] and electron rest mass can be fitted with the following relations.

$$\left. \begin{aligned} G_F &\cong \left(\frac{m_e}{m_p}\right)^2 \hbar c R_0^2 \cong \frac{4G_s^2 m_e^2 \hbar}{c^3} \\ &\cong 1.4402 \times 10^{-62} \text{ J.m}^3 \end{aligned} \right\} \quad (30)$$

$$m_e \cong \sqrt{\frac{G_F c^3}{4G_s^2 \hbar}} \quad \text{and} \quad \frac{2G_s m_e}{c^2} \cong \sqrt{\frac{G_F}{\hbar c}} \quad (31)$$

17) In a theoretical and verifiable approach, magnitude of the Newtonian gravitational constant can be estimated with nuclear elementary physical constants. For example, with reference to Planck scale, we noticed that [14],

$$\frac{\pi R_0^2}{\pi R_{pl}^2} \cong \frac{G_s^2 m_p^2}{G_N \hbar c} \cong \left(\frac{m_p}{m_e}\right)^{12} \quad (32)$$

$$\text{where, } R_0 \cong \frac{2G_s m_p}{c^2}, \quad R_{pl} \cong \frac{2G_N M_{pl}}{c^2} \cong 2\sqrt{\frac{G_N \hbar}{c^3}}$$

$$\left. \begin{aligned} G_N &\cong \left(\frac{m_e}{m_p}\right)^{10} \left(\frac{G_F c^2}{4\hbar^2}\right) \cong \left(\frac{m_e}{m_p}\right)^{12} \left(\frac{G_s m_p^2}{\hbar c}\right) G_s \\ &\cong (6.66 \text{ to } 6.68) \times 10^{-11} \text{ m}^3 \text{ kg}^{-1} \text{ sec}^2 \end{aligned} \right\} \quad (33)$$

18) Our proposed assumptions seem to ease the way of understanding and refining the basic concepts of final unification.

## Conclusion

Semi empirical mass formula and Fermi gas model, both, are lagging in implementing the strong coupling constant and gravity in nuclear structure. In this context, understanding and estimating nuclear binding energy with ‘strong interaction’ and ‘unification’ concepts seem to be quite interesting and needs a serious consideration at basic level. In this context, relations (6), (7), (9), (10), (11), (20), (21), and (24) can be considered as favorable or supporting tools for our proposed model. With further research, mystery of magic numbers can be understood and a unified model of nuclear binding energy and stability scheme pertaining to high and low energy nuclear physics can be developed.

## Acknowledgements

Authors are very much thankful to Dr. N. Ghahramany and team for their intuitive and heuristic contributions in this most advanced field of nuclear research. Author Seshavatharam is indebted to professors shri M. Nagaphani Sarma, Chairman, shri K.V. Krishna Murthy, founder Chairman, Institute of Scientific Research in Vedas (I-SERVE), Hyderabad, India and Shri K.V.R.S. Murthy, former scientist IICT (CSIR), Govt. of India, Director, Research and Development, I-SERVE, for their valuable guidance and great support in developing this subject.

## References

- [1] K. Tennakone. (1974). Electron, muon, proton, and strong gravity. *Phys. Rev. D* 10, 1722
- [2] Salam, Abdus; Sivaram, C. (1993). Strong Gravity Approach to QCD and Confinement. *Modern Physics Letters A*, 8 (4): 321–326.
- [3] Sivaram, C, Sinha, K. (1977). Strong gravity, black holes, and hadrons. *Physical Review D*. 16 (6): 1975-1978.
- [4] C. Sivaram et al. (2013). Gravity of Accelerations on Quantum Scales. Preprint, arXiv:1402.5071
- [5] Roberto Onofrio. (2013). Proton radius puzzle and quantum gravity at the Fermi scale. *EPL* 104, 20002
- [6] O. F. Akinto, Farida Tahir. (2017) Strong Gravity Approach to QCD and General Relativity. arXiv:1606.06963v3
- [7] Seshavatharam U.V.S & Lakshminarayana S, On the role of strong interaction in understanding nuclear beta stability line and nuclear binding energy. *Proceedings of the DAE-BRNS Symp. On Nucl. Phys.* 60, 118-119 (2015)
- [8] Seshavatharam U.V.S & Lakshminarayana S, On the role of ‘reciprocal’ of the strong coupling constant in nuclear structure. To be appeared in *Journal of Nuclear Sciences*, Ankara University, Turkey.
- [9] Seshavatharam U.V.S & Lakshminarayana S, Understanding Nuclear Stability and Binding Energy with Very Large Gravitational coupling and Strong Nuclear Charge. To be appeared in the proceedings of ICNPAP conference, October, 2018, Centre for Applied Physics, Central University of Jharkhand, Ranchi, India.
- [10] Seshavatharam U.V.S & Lakshminarayana S, On the possible existence of strong elementary charge and its applications. To be appeared in the proceedings of ICNPAP conference, October, 2018, Centre for Applied Physics, Central University of Jharkhand, Ranchi, India. Seshavatharam
- [11] U.V.S & Lakshminarayana S, A new approach to understand nuclear stability and binding energy. *Proceedings of the DAE-BRNS Symp. On Nucl. Phys.* 62, 106-107 (2017)
- [12] Seshavatharam U.V.S & Lakshminarayana S, Understanding the constructional features of materialistic atoms in the light of strong nuclear gravitational coupling. *Materials Today: 3/10PB, Proceedings 3* (2016) pp. 3976-3981
- [13] Seshavatharam U.V.S & Lakshminarayana S, Understanding the basics of final unification with three gravitational constants associated with nuclear, electromagnetic and gravitational interactions. *Journal of Nuclear Physics, Material Sciences, Radiation and Applications Vol-4, No-1, 1-19*, (2017)
- [14] Seshavatharam U.V.S & Lakshminarayana S, A Virtual Model of Microscopic Quantum Gravity. *Prespacetime Journal*, Vol. 9, Issue 1, pp. 58-82 (2018)
- [15] Seshavatharam U.V.S & Lakshminarayana S, (2015). To confirm the existence of nuclear gravitational constant, *Open Science Journal of Modern Physics*. 2(5): 89-102
- [16] Seshavatharam U.V.S & Lakshminarayana S, (2016) Towards a workable model of final unification. *International Journal of Mathematics and Physics* 7, No1,117-130.
- [17] Seshavatharam U.V.S & Lakshminarayana S, (2015) Lakshminarayana. To Validate the Role of Electromagnetic and Strong Gravitational Constants via the Strong Elementary Charge. *Universal Journal of Physics and Application* 9(5): 210-219
- [18] Seshavatharam U.V.S & Lakshminarayana S. Scale Independent Workable Model of Final

- Unification. *Universal Journal of Physics and Application* 10(6): 198-206, 2016.
- [19] Seshavatharam U.V.S & Lakshminarayana S, To unite nuclear and sub-nuclear strong interactions. *International Journal of Physical Research*, 5 (2) 104-108 (2017)
- [20] Seshavatharam U.V.S & Lakshminarayana S, On the role of strong coupling constant and nucleons in understanding nuclear stability and binding energy. *Journal of Nuclear Sciences*, Vol. 4, No.1, 7-18, (2017)
- [21] Seshavatharam U.V.S & Lakshminarayana S, A Review on Nuclear Binding Energy Connected with Strong Interaction. *Prespacetime Journal*, Vol. 8, Issue 10, pp. 1255-1271 (2018)
- [22] Seshavatharam U.V.S & Lakshminarayana S, Simplified Form of the Semi-empirical Mass Formula. *Prespacetime Journal*, Volume 8, Issue 7, pp.881-810 (2017)
- [23] Chowdhury, P.R. et al. Modified Bethe-Weizsacker mass formula with isotonic shift and new driplines. *Mod. Phys. Lett. A20* p.1605-1618. (2005).
- [24] Oganessian, Yu & K Utyonkov, V. (2015). Super-heavy element research. *Reports on progress in physics*. Physical Society (Great Britain). 78. 036301.
- [25] Ghahramany N et al. New approach to nuclear binding energy in integrated nuclear model. *Physics of Particles and Nuclei Letters*, 2011, Vol. 8, No. 2, pp. 97–106.
- [26] Ghahramany N et al. New scheme of nuclide and nuclear binding energy from quark-like model. *Iranian Journal of Science & Technology* (2011) A3: 201-208
- [27] W. D. Myers et al. Table of Nuclear Masses according to the 1994 Thomas-Fermi Model.(from nsdssd.lbl.gov)
- [28] Seshavatharam U.V.S & Lakshminarayana S. On the Possible Existence of Strong Elementary Charge & Its Applications. *Prespacetime Journal*, Vol. 9, Issue 7, pp. 642-651 (2018)
- [29] Ghahramany N et al. Quark-Gluon Plasma Model and the Origin of Magic Numbers. *Iranian Physical Journal*, 1-2, 35-38 (2007).
- [30] Tran, D. T. et al, Evidence for prevalent  $Z = 6$  magic number in neutron-rich carbon isotopes. *Nature Communications*, Vol 9, Article number: 1594 (2018)
- [31] Fridmann J, et al. Magic nucleus  $^{42}\text{Si}$ . *Nature*. 2005; 435:922-924.
- [32] Ghahramany N et al. Stability and Mass Parabola in Integrated Nuclear Model. *Universal Journal of Physics and Application* 1(1): 18-25, 2013.
- [33] Ludwig, Hendrik & Ruffini, Remo. (2014). Gamow's Calculation of the Neutron Star Critical Mass Revised. *Journal of the Korean Physical Society*. 65. 10.3938/jkps.65.892.
- [34] I.F. Mirabel. The formation of stellar black holes. *New Astronomy Reviews Volume 78*, August 2017, 1-15
- [35] [https://en.wikipedia.org/wiki/Neutron\\_star](https://en.wikipedia.org/wiki/Neutron_star)
- [36] C. Patrignani et al. (Particle Data Group), *Chin. Phys. C*, 40, 100001 (2016) and 2017 update
